# Supplementary material for: Comparative in vivo gene expression of the closely related bacteria Photorhabdus temperata and Xenorhabdus koppenhoeferi upon infection of the same insect host, Rhizotrogus majalis
Source: PubMed Central journal article supplement (PMC2760582; doi:10.1186/1471-2164-10-433), 2009-09-15
Supplement: 1471-2164-10-433-S4.pdf [file 1471-2164-10-433-S4.pdf]

1 **Table S1:** Oligonucleotide sequences used for quantitative real-time PCR analyses

2

| Gene         | Forward primer (5' - 3')   | Reverse primer (5' - 3')  |
|--------------|----------------------------|---------------------------|
| <i>cysK</i>  | TAATACCGGGATTGCGCTTGCCTA   | ATGGCGCCTTTCATACCTTTAGCG  |
| <i>def</i>   | ACACGGCCTTCTTCAATCCCAGTA   | ATGTACGTAGAGGAAGGCATTGGC  |
| <i>dnaB</i>  | CCTGCAATTAATGCGGGTTCCATC   | TACGGTTGAGCTGAGAAAGTGCGA  |
| <i>lysR</i>  | AGAAGGGCGGTGAATGGGTTTGAT   | GGAAGGCATCGGCGTTTCTATTGT  |
| <i>pchC</i>  | AGAAGCTGCGAGAATGCCGATAGT   | GCCATCACCTGGCAATCAATCCAT  |
| <i>pckA</i>  | ATTGTCCGTGATGATGTCACCCGT   | CGCACACAGAAAGCATCGACAAT   |
| <i>phoP</i>  | ATGGTTTGAGTCTGATCCGTCGCT   | GCCTGCATCCGGGCAATAATTTCT  |
| <i>ptst1</i> | GATTCGCCGATGGCGATACTACT    | TGGCAGTTTGCCTTGTAGGA      |
| <i>sctL</i>  | CAAACCCAGCTTCAGTGTCAGCAA   | TGTTGCCGCCTGTTTCAGGATTAAC |
| <i>selD</i>  | AAATGACAGCGCTTCAGCGTAACC   | TCAGAACTCTGCCTGACTGTTGCT  |
| <i>tolB</i>  | AGCTGGCGTTTGCCCTGTCTAAAT   | AGACCAAAGTCTGGTTATCCGGCA  |
| <i>virB</i>  | TTATTTTCGGGTGGTGCCGTCTAGT  | AAGAGATCCTCATCACGCCCATCT  |
| <b>16SPt</b> | AGCGCAACCCTTATCCTTTGTTGC   | TCGCGAGGTCGCTTCACTTTGTAT  |
| <i>aceK</i>  | TGGTCTGAGCCAAGATCACAGTTG   | ACTGATGAGGAAATCTGGGCGCTT  |
| <i>clpP</i>  | TCAGCCATTAGGTGGTTTCCAAGG   | CACGTTTCAGTGTCTGTGCAATCT  |
| <i>cobJ</i>  | AAAGCGCAATGTGGAAGTCAGGCT   | CGCGGATTGTAGAAACAGACCACA  |
| <i>dacC</i>  | TCCGAAGTAGCTTTGGGAGTGGA    | GCCTCTTTAGCAACCAATGGACAC  |
| <i>dld</i>   | CGTCGCCACATTCTGTCTACTTTCCA | AAATGGCATCCATCCGCCCTTCA   |
| <i>malF</i>  | GGGATAGCCCAACCATGTATTTACG  | CTGGTGCTGAATGGGTTGTTTGGT  |
| <i>res</i>   | AATTTTCAGTGCGACTCCTTTGCGG  | TCAATTTCTTCCCGTCTTCCCGA   |
| <i>rtxC</i>  | TGGTATTTCCGTCAATGTGGCGTG   | GGGCATAAGAGGCGTTGATGTTCA  |
| <i>tilS</i>  | TTATGAGCCACTTCTGACGGCACT   | CGTCACGTAAGCGAACCAGCAAAT  |
| <i>virH</i>  | ACTGACCCGATTATTACAGCGCCT   | TGCAATACCAGCTCATGTTTCGC   |
| <i>xhIA</i>  | GTACCCTGCAAAGCTTCAGCACTT   | TGACGTAACGACCTGACCATTGCT  |
| <i>xkst4</i> | AGCTGGTAGAGCATCTCCCTTACA   | ACCAACTGAGCTAATCGCCCAATC  |
| <b>16SXk</b> | AGCGCAACCCTTATCCTTTGTTGC   | TCGCGAGGTCGCTTCTCTTTGTAT  |

3
